# Supplementary material for: ZDHHC19 Is Dispensable for Spermatogenesis, but Is Essential for Sperm Functions in Mice
Source: MDPI journal article supplement (doi:10.3390/ijms22168894), 2021-08-18
Supplement: s1 [file s1]

# Supplementary Materials

Supplementary Table S1. Primers used in genotyping.

| Gene Name      | Forward Primers                   | Reverse Primers                                                   | Amplicon Size                      |
|----------------|-----------------------------------|-------------------------------------------------------------------|------------------------------------|
| <i>Zdhhc19</i> | GTGTTT-<br>GCTGCCTTCAATGTA<br>ACG | CTCCAGCAGTCAG-<br>CAAGATCGAAG<br>GTAAA-<br>GAAGTCCTGATGTGC<br>GAG | Homozygous:536bp<br>Wildtype:617bp |

Supplementary Table S2. Primers used in real-time PCR.

| Gene Name      | Forward Primers       | Reverse Primers         |
|----------------|-----------------------|-------------------------|
| <i>Zdhhc19</i> | TGTGACACTTGTGAAGGAACC | AAAAACAGCAGCAGCGTTACA   |
| <i>Gapdh</i>   | AGGTCGGTGTGAACGGATTG  | TGTAGACCATGTAGTTGAGGTCA |

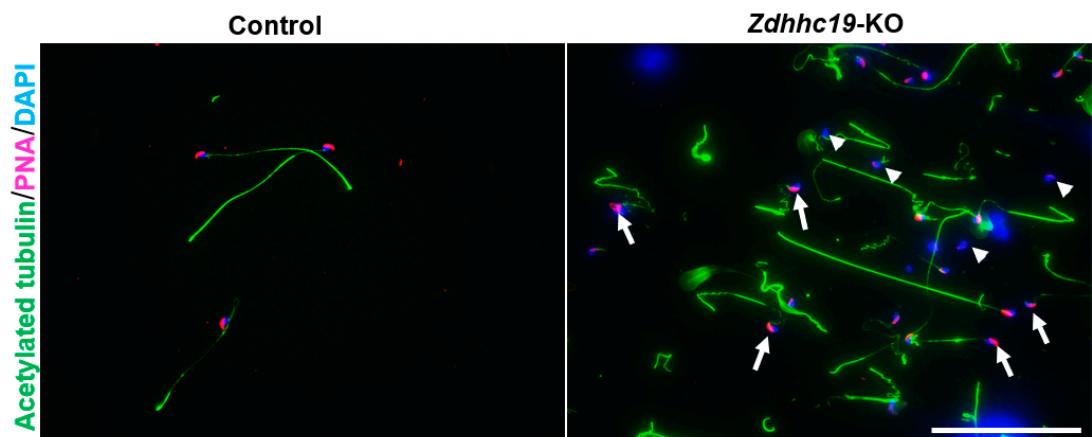

**Supplementary Figure S1.** *Zdhhc19* deletion caused abnormal sperm flagella. Immunofluorescence analyses of acetylated-TUBULIN and PNA in spermatozoa from adult KO and control littermates, counter-stained with DAPI. White arrows indicate intact acrosomes with abnormal sperm tails, while arrowhead point to the acrosome-reacted sperm that had abnormal tails. Scale bar, 200  $\mu$ m.
